1 Contact patterns of UK home delivery drivers and their use of protective  
2 measures during the COVID-19 pandemic: a cross-sectional study

3

4 Jessica RE Bridgen; Centre for Health Informatics, Computing and Statistics, Lancaster Medical  
5 School, Lancaster University, Lancaster, UK

6 Hua Wei; School of Health Sciences Centre, University of Manchester, Manchester, UK

7 Carl Whitfield; Immunity and Respiratory Medicine, University of Manchester, Manchester, UK

8 Yang Han; Department of Mathematics, University of Manchester, Manchester, UK

9 Ian Hall; Department of Mathematics, University of Manchester, Manchester, UK

10 Chris P Jewell; Department of Mathematics and Statistics, Lancaster University, Lancaster, UK

11 Martie JA van Tongeren; Academic Health Sciences Centre, University of Manchester,  
12 Manchester, UK

13 Jonathan M Read; Centre for Health Informatics, Computing and Statistics, Lancaster Medical  
14 School, Lancaster University, Lancaster, UK

15 [jonathan.read@lancaster.ac.uk](mailto:jonathan.read@lancaster.ac.uk) (corresponding author)

16

17 Word count: 2634

18 **ABSTRACT**

19 **Objectives:** To quantify contact patterns of UK home delivery drivers and identify  
20 protective measures adopted during the pandemic.

21 **Methods:** We conducted a cross-sectional online survey to measure the interactions  
22 of 170 UK delivery drivers during a working shift between 7 December 2020 and 31  
23 March 2021.

24 **Results:** Delivery drivers had a mean number of 71.6 (95% Confidence Interval (CI)  
25 61.0 to 84.1) customer contacts per shift and 15.0 (95%CI 11.19 to 19.20) depot  
26 contacts per shift. Maintaining physical distancing with customers was more common  
27 than at delivery depots. Prolonged contact (more than 5 minutes) with customers  
28 was reported by 5.4% of drivers on their last shift. We found 3.0% of drivers had  
29 tested positive for SARS-CoV-2 since the start of the pandemic and 16.8% of drivers  
30 had self-isolated due to a suspected or confirmed case of COVID-19. Additionally,  
31 5.3% (95%CI 2.3% to 10.2%) of participants reported having worked whilst ill with  
32 COVID-19 symptoms, or with a member of their household having a suspected or  
33 confirmed case of COVID-19.

34 **Conclusion:** Delivery drivers had a large number of face-to-face customer and  
35 depot contacts per shift compared to other working adults during this time. However,  
36 transmission risk may be curtailed as contact with customers was of short duration.  
37 Most drivers were unable to maintain physical distance with customers and at depots  
38 at all times. Usage of protective items such as face masks and hand sanitizer was  
39 widespread.

40  
41

## 42 INTRODUCTION

43 The delivery sector has been central in ensuring that services and supplies have  
44 remained available throughout the COVID-19 pandemic in the UK. There has been  
45 an unprecedented demand for home deliveries during the pandemic, rising sharply  
46 with the implementation of nationwide ‘stay at home’ orders.[1] The UK government  
47 classed delivery drivers as *key workers*, defined as workers critical to the COVID-19  
48 response.[2] Shielding guidance for clinically extremely vulnerable individuals in  
49 January 2021 advised the use of food and prescription delivery services to minimise  
50 the need to leave home.[3] As non-essential businesses were forced to close for  
51 extended periods of time in 2020 and 2021, many businesses relied on online sales  
52 to generate income.[4]

53 Transmission of SARS-CoV-2, the virus that causes COVID-19, primarily occurs  
54 through airborne routes, however indirect transmission can take place through  
55 contaminated surfaces.[5,6] High contact occupations are thought to be associated  
56 with an increased likelihood of employees being exposed to SARS-CoV-2 and  
57 developing clusters of cases in the workplace.[7,8] Reducing the number of social  
58 contacts, increasing ventilation and frequent hand washing were advised methods to  
59 reduce workplace risk of exposure to SARS-CoV-2.[9] Delivery drivers interact  
60 regularly with other employees at depots (or collection hubs) and with a large  
61 number of customers. To mitigate against infection, contact-free deliveries became  
62 widely available to minimise contact and reduce transmission risk between delivery  
63 drivers and customers.[10] However, several studies have found that transport  
64 workers were at a higher risk of severe COVID-19 when compared with non-  
65 essential workers.[11,12]

66 We conducted a cross-sectional online survey between 7 December 2020 and 31  
67 March 2021 to quantify behaviours thought to be associated with transmission risk of  
68 SARS-CoV-2. The study period coincides with the peak and gradual decline of the  
69 second wave of COVID-19 in the UK, following the emergence of the alpha variant.  
70 [13,14] The UK also entered a period of lockdown during this time, where ‘stay at  
71 home’ orders were in place, and non-essential businesses were closed to reduce  
72 transmission.[15] We aimed to quantify the contact patterns of delivery drivers within  
73 their depot and with their customers, identifying the types of contact they were  
74 making.

75

## 76 METHODS

77

### 78 Survey methodology

79 An anonymous online survey (the ‘CoCoNet: Home Delivery Driver survey’) was  
80 used for data collection. The survey design was adapted from a previous population-  
81 wide study.[16] Study participants had to meet the following inclusion criteria: a  
82 resident in the UK at the time of the survey, working as a home delivery driver and

83 aged 18 or over. The survey was promoted through university press releases,  
84 engagement with delivery driver groups on social media (LinkedIn and Facebook)  
85 and targeted Facebook advertisements.

86

87 Survey responses received between 9 December 2020 and 31 March 2021 were  
88 included in the analysis. Partial survey responses were analysed for all questions  
89 that had been displayed to the participant.

90

91 Age, sex, ethnicity, household size and other demographic information was collected  
92 from participants. Employment information was requested, including employment  
93 type, working hours, types of items typically delivered and sick pay eligibility. The  
94 survey included questions pertaining directly to COVID-19, such as whether  
95 participants had tested positive for SARS-CoV-2, if they had to self-isolate due to  
96 suspected or confirmed SARS-CoV-2 infection and if they had worked whilst being ill  
97 with COVID-19 symptoms. Participants were asked to recall specific details from  
98 their last shift working as a delivery driver, including the number of customers they  
99 met face-to-face, the number of individuals they had a face-to-face conversation with  
100 at their depot and their use of personal protective equipment (PPE). The survey  
101 questions can be found in Supplementary Material.

102

### 103 **Primary and secondary outcome measurements**

104 Our primary outcome measurement was the number of contacts delivery drivers  
105 have per shift. This was stratified into contact with customers and contact with  
106 individuals (employees or customers) at a delivery depot. A contact was defined as  
107 someone whom the participant had a face-to-face conversation with. Secondary  
108 outcome measurements were: the number of deliveries per shift; the type of contact  
109 drivers were having with customers; ability to maintain physical distance; use of  
110 protective items; COVID-related presenteeism; the frequency of self-isolation and  
111 COVID-19 infection.

112

### 113 **Data analysis**

114 Study representativeness was assessed by comparing participant demographics  
115 with the Labour Force Survey (LFS) estimates for delivery drivers and couriers.  
116 Quarterly labour force surveys for the time period November 2020 to January 2022  
117 were aggregated for comparison, due to the relatively small sample size of delivery  
118 drivers and couriers included in each individual survey.[17–22]

119

120 To identify occupational and personal characteristics associated with participants'  
121 interactions with customers, we fitted a negative binomial regression model to the  
122 number of customer contacts per shift. Explanatory variables included in the model  
123 were: age, sex, employment type, furthest distance travelled from the collection point  
124 to a delivery, weekly working hours and the type of items delivered. The model was  
125 assessed for multicollinearity by calculating the variance inflation factor for each  
126 independent variable.

127

## 128 **Ethics statement**

129 This study was approved by the Faculty of Health and Medicine Ethics Committee at  
130 Lancaster University (reference FHMREC20040). Participation in the study was  
131 voluntary and all participants provided consent before proceeding with the survey.

132

## 133 **RESULTS**

134

### 135 **Participant demographics**

136 We received 170 survey responses between 9 December 2020 and 31 March 2021  
137 which met our inclusion criteria. Male participants accounted for 75.3% (128/170) of  
138 the sample, our survey over sampled females when compared to the aggregated  
139 LFS; Table 1. The majority of participants were aged 40 to 59 (56.4%, 96/170).  
140 Participants predominantly resided in England (81.8%, 139/170), with 1.8% (3/170)  
141 of participants residing in Northern Ireland, 10.6% (18/170) residing in Scotland and  
142 5.9% (10/170) residing in Wales. We found that our sample was representative by  
143 ethnicity and nation when compared to the population estimates of delivery drivers  
144 as reported by the aggregated LFS; Table 1.

145

### 146 **Employment situation**

147 The majority of participants reported their employment situation to be either self-  
148 employed and completely independent (54.3%, 95% confidence interval (CI) 46.3%  
149 to 62.2%) or employed full time by one company (28.4%, 95%CI 21.6% to 36.0%);  
150 see supplementary material Table 1. Over half of delivery drivers (53.1%, 95%CI  
151 45.1% to 61.0%) reported their weekly working hours to be between 31 and 50  
152 hours, and 22.2% (95%CI 16.1% to 29.4%) of delivery drivers reported working more  
153 than 50 hours a week. The majority of participants reported their most recent working  
154 shift to be during the week of completing the survey (92.6%, 95%CI 87.4% to  
155 96.1%). A small proportion of participants reported their most recent working shift to  
156 be more than a month before completing the survey (2.5%, 95%CI 0.7% to 6.2%).  
157 Most participants (68.2%, 95%CI 60.1% to 75.5%) reported that they did not receive  
158 statutory sick leave pay whilst working as delivery drivers.

159

### 160 **Workplace interactions**

161 The mean number of customer contacts was 71.6 (95%CI 61.0 to 84.1) per shift. We  
162 found 95.2% (95%CI 90.4% to 98.1%) of participants had brief face-to-face  
163 interactions (less than 5 minutes) with customers on their last shift, 5.4% (95%CI  
164 2.4% to 10.4%) of participants had prolonged face-to-face interactions (more than 5  
165 minutes) with customers and 8.2% (95%CI 4.3% to 13.8%) had entered a customer's  
166 property. We found that 61.9% (95%CI 53.5% to 69.8%) of participants were able to  
167 maintain physical distance with customers at all times during their last shift. A small  
168 proportion of participants (2.7%, 95%CI 0.7% to 6.8%) reported that they could not  
169 maintain physical distance at all on their last shift.

170

171 The mean number of contacts per shift in depot (where drivers collected items for  
172 delivery) was 27.9 (95%CI 12.2 to 55.8). This was reduced to 15.0 (95%CI 11.19 to  
173 19.20) contacts per shift after excluding a single individual who reported making an  
174 exceptionally large number of contacts. We found that 42.4% (95%CI 34.2% to  
175 50.9%) of participants reported that they were able to maintain physical distance  
176 from contacts at the depot at all times during their last shift. Whereas 8.3% (95%CI  
177 4.4% to 14.1%) of participants were unable to maintain physical distance at all on  
178 their previous shift.

179

180 We found 10.5% (95%CI 6.1% to 16.4%) of participants shared a vehicle with a  
181 colleague during their last working week, of which, 56.2% (95%CI 29.9% to 80.2%)  
182 reported sharing the vehicle with the same colleague throughout the week.

183

184 The number of contacts made per shift, including both customer and depot  
185 interactions, was positively correlated with the number of deliveries made per shift;  
186 Figure 1A. Participants who reported typically delivering only large items had the  
187 greatest number of customer and depot contacts per shift, making on average more  
188 customer contacts than deliveries per shift; Figure 1B. While most drivers delivering  
189 large items only reported a one-to-one ratio of customer contacts and deliveries, one  
190 individual reported four times the number of customer contacts than deliveries.

191

### 192 **Frequency and type of deliveries**

193 We found that the mean number of deliveries per shift was 121.8 (95%CI 97.9 to  
194 152.3). Approximately half of participants (51.0%, 95%CI 42.8% to 59.1%) reported  
195 that the furthest distance they travelled from a collection point to a delivery address  
196 during their last working week was under 20 miles. The majority of delivery drivers  
197 surveyed (52.5%, 95%CI 44.5% to 60.4%) reported that they typically delivered  
198 small parcels (including letters and mail). We found that drivers delivering small  
199 parcels and large items had the highest mean number of deliveries per shift, whilst  
200 takeaway and grocery delivery drivers had the lowest; Figure 1B.

201

### 202 **Predictors of customer contacts**

203 A negative binomial model was fitted to the number of face-to-face customer  
204 interactions per shift. The variance inflation factor was less than five for all model  
205 coefficients indicating multicollinearity was not present. Participants aged 18 to 29  
206 (adjusted incidence rate ratio (aIRR) 1.65, 95%CI 1.07 to 2.06) and aged 40 to 49  
207 (aIRR 1.64, 95%CI 1.15 to 2.34) had a higher number of customer contacts per shift  
208 than those aged 50 to 59; Figure 2, supplementary material Table 2. We found that  
209 delivery drivers who were employed by one company full time had a lower number of  
210 customer contacts per shift than those self-employed and independent (aIRR 0.66,  
211 95% CI 0.47 to 0.94). Participants who usually deliver only groceries (aIRR 0.34,  
212 95%CI 0.18 to 0.64), deliver only takeaways (aIRR 0.19, 95%CI 0.11 to 0.37), deliver  
213 other unlisted items (aIRR 0.43, 95%CI 0.24 to 0.80) and those who deliver other



214 combinations of items listed (aIRR 0.58, 95%CI 0.38 to 0.93) had fewer customer  
215 contacts than those that usually delivery only small parcels.

### 216 **COVID-19 infection, self-isolation and presenteeism**

217 We found that 3.0% (95%CI 1.0% to 6.9%) of delivery drivers surveyed reported that  
218 they had tested positive for COVID-19. Moreover, 16.8% (95%CI 11.4% to 23.3%) of  
219 delivery drivers had self-isolated since the start of the pandemic due to a suspected  
220 or confirmed case of COVID-19. Approximately one in twenty drivers (5.3%, 95%CI  
221 2.3% to 10.2%) reported that they have continued to work whilst being ill with  
222 COVID-19 symptoms or with a member of their household having a suspected or  
223 confirmed case of COVID-19. In this situation, financial reasons were most often  
224 cited as a reason for continuing to work (85.7%, 95%CI 42.1% to 99.6%).

225

### 226 **Protective measures**

227 We found that 68.3% (95%CI 60.0% to 75.7%) of participants were provided with  
228 some PPE items by their employers or contracting companies. However, less than  
229 half of participants (48.3%, 95%CI 39.9% to 56.7%) felt that the PPE provided  
230 effective protection. Facemasks (82.4%, 95%CI 75.4% to 88.0%) and hand sanitiser  
231 (83.7%, 95%CI 76.8% to 89.1%) were the protective items most commonly used by  
232 delivery drivers on their last shift. Participants who shared a vehicle during their last  
233 working week most often reported using hand sanitizer to prevent infection when  
234 sharing a vehicle (81.2%, 95%CI 54.3% to 96.0%), with 50.0% (95%CI 24.7% to  
235 75.3%) of participants reporting wearing a facemask and 50.0% (95%CI 24.7% to  
236 75.3%) reporting keeping a window open.

237

## 238 **DISCUSSION**

239

240 We found that delivery drivers made a large number of contacts per shift both at their  
241 depot (15.0 per shift) and with customers (71.6 per shift). In comparison, Jarvis *et al.*  
242 found that the mean number of contacts among the general population attending  
243 their workplace between January 2021 and March 2021 was between 3 and 10  
244 contacts per day; this included contacts made outside of the workplace [23]. This  
245 suggests delivery drivers have a very large number of contacts compared to the  
246 general workforce at this time, which may lead to a higher risk of SARS-CoV-2  
247 infection. The importance of contact duration in respiratory virus transmission has  
248 been widely documented.[24–28] Face-to-face interactions between delivery drivers  
249 and customers are likely to take place outside and to be very short in duration, with  
250 only 5.4% of drivers reporting any prolonged contact (more than 5 minutes) with  
251 customers during their last working shift. Therefore, whilst delivery drivers have a  
252 large number of contacts this may pose only a small risk in terms of exposure and  
253 transmission of SARS-CoV-2. Similarly, sharing a vehicle with a colleague for  
254 deliveries may be a type of high-risk contact. Nevertheless, as we found most work-  
255 related vehicle sharing was fixed-pairing (pair that share a vehicle is fixed) the risk of  
256 multiple transmission events is likely to be largely reduced. The duration of contacts  
257 made at the depot was not recorded.

258

259 The use of protective measures in the workplace was common. Most delivery drivers  
260 reported being able to maintain physical distance with customers and at the depot at  
261 least some of the time during their last shift, however, most drivers reported not  
262 being able to maintain distance at all times particularly when at the depot.  
263 Facemasks and hand sanitiser were commonly used by drivers during their shift.  
264 While facemasks offer varying levels of protection to the wearer they help to prevent  
265 transmission from an infected individual to others.[29] The majority of drivers  
266 received some items of protective items from their employers, however, less than  
267 half of drivers felt that this provided effective protection.

268

269 By 7 December 2020, there had been 1,770,619 confirmed cases of COVID-19 in  
270 the UK, accounting for approximately 2.6% of the UK population.[13,30] We found  
271 3.0% of delivery drivers surveyed had tested positive for SARS-CoV-2 since the start  
272 of the pandemic and over a sixth of delivery drivers reported having to self-isolate  
273 due to a suspected or confirmed case of SARS-CoV-2. A small proportion of delivery  
274 drivers reported working with symptoms of COVID-19 or while a member of their  
275 household had a confirmed or suspected SARS-CoV-2 infection. The majority of  
276 drivers reported continuing to work in this situation due to financial reasons, this may  
277 be associated with statutory sick pay being unavailable for most drivers. Lack of  
278 access to paid sick leave is one of the main risk factors for respiratory infectious  
279 disease-related presenteeism.[31] Providing access to paid sick leave may therefore  
280 help to improve adherence to public health measures such as self-isolation.

281

282 Participants self-reported how many face-to-face interactions they had with  
283 customers and at the depot on their last working shift as a delivery driver. For most  
284 participants their last working shift was during the same week as completing the  
285 survey, but a small proportion (approximately 2.5%) were recalling from a shift over a  
286 month ago. There is some risk of uncertainty in recall particularly with the small  
287 proportion of participants recalling from a less recent shift. This study may suffer  
288 from recruitment bias, the survey was conducted online only without a strict  
289 recruitment process. Mean number of contacts were calculated per shift and  
290 therefore cannot be directly compared with other contact studies which calculate the  
291 number of contacts per hour or per day. Questions pertaining to SARS-CoV-2  
292 infection and self-isolation referred to the time period from the start of the pandemic  
293 to completing the survey. We did not collect data on how long participants had been  
294 working as delivery drivers, therefore estimations of the prevalence of SARS-CoV-2  
295 infection and self-isolation amongst participants may not be an accurate  
296 representation of all delivery drivers.

297

298



299 **Acknowledgements**

300 We would like to thank the participants of the study for their time and information.

301

302 **Contributions**

303 All authors conceived and designed the study. JREB conducted the analysis and  
304 wrote the first draft of the manuscript. All authors edited the manuscript.

305

306 **Data Availability Statement**

307 Data are available in a public, open access repository. The survey data are available  
308 from Lancaster University's research directory at:

309 <https://doi.org/10.17635/lancaster/researchdata/553>. License: Creative Commons

310 Attribution licence (CC BY).

311

312 **Competing Interests**

313 We declare we have no competing interests.

314

315 **Funding**

316 HW, CW, YH, IH and MvT received funding from the UKRI COVID-19 Rapid  
317 Response call, Grant Ref: MC\_PC\_19083. JMR and CPJ were supported by UKRI  
318 through the JUNIPER modelling consortium, Grant Ref: MR/V038613/1. JREB is  
319 supported by a Lancaster University Faculty of Health and Medicine doctoral  
320 scholarship.

321

## 322 **References**

- 323 1 Office for National Statistics. Impact of the coronavirus (COVID-19) pandemic  
324 on retail sales in 2020.  
325 2021. [https://www.ons.gov.uk/economy/grossdomesticproductgdp/articles/impact](https://www.ons.gov.uk/economy/grossdomesticproductgdp/articles/impactofthecoronaviruscovid19pandemiconretailsalesin2020/2021-01-28)  
326 [ofthecoronaviruscovid19pandemiconretailsalesin2020/2021-01-28](https://www.ons.gov.uk/economy/grossdomesticproductgdp/articles/impactofthecoronaviruscovid19pandemiconretailsalesin2020/2021-01-28) (accessed  
327 Sep 2021).
- 328 2 GOV UK. Children of critical workers and vulnerable children who can access  
329 schools or educational settings. Gov.uk.  
330 [https://www.gov.uk/government/publications/coronavirus-covid-19-maintaining-](https://www.gov.uk/government/publications/coronavirus-covid-19-maintaining-educational-provision/guidance-for-schools-colleges-and-local-authorities-on-maintaining-educational-provision)  
331 [educational-provision/guidance-for-schools-colleges-and-local-authorities-on-](https://www.gov.uk/government/publications/coronavirus-covid-19-maintaining-educational-provision/guidance-for-schools-colleges-and-local-authorities-on-maintaining-educational-provision)  
332 [maintaining-educational-provision](https://www.gov.uk/government/publications/coronavirus-covid-19-maintaining-educational-provision/guidance-for-schools-colleges-and-local-authorities-on-maintaining-educational-provision) (accessed Jan 2022).
- 333 3 Office for National Statistics. Coronavirus and clinically extremely vulnerable  
334 people in England - Office for National Statistics.  
335 2021. [https://www.ons.gov.uk/peoplepopulationandcommunity/healthandsocialca](https://www.ons.gov.uk/peoplepopulationandcommunity/healthandsocialcare/conditionsanddiseases/bulletins/coronavirusandclinicallyextremelyvulnerablepeopleinengland/11octoberto16october2021)  
336 [re/conditionsanddiseases/bulletins/coronavirusandclinicallyextremelyvulnerable](https://www.ons.gov.uk/peoplepopulationandcommunity/healthandsocialcare/conditionsanddiseases/bulletins/coronavirusandclinicallyextremelyvulnerablepeopleinengland/11octoberto16october2021)  
337 [eopleinengland/11octoberto16october2021](https://www.ons.gov.uk/peoplepopulationandcommunity/healthandsocialcare/conditionsanddiseases/bulletins/coronavirusandclinicallyextremelyvulnerablepeopleinengland/11octoberto16october2021) (accessed Jan 2022).
- 338 4 Coronavirus: how people and businesses have adapted to lockdowns.  
339 2021. [https://www.ons.gov.uk/economy/economicoutputandproductivity/output/ar](https://www.ons.gov.uk/economy/economicoutputandproductivity/output/articles/coronavirushowpeopleandbusinesseshaveadaptedtolockdowns/2021-03-19)  
340 [ticles/coronavirushowpeopleandbusinesseshaveadaptedtolockdowns/2021-03-](https://www.ons.gov.uk/economy/economicoutputandproductivity/output/articles/coronavirushowpeopleandbusinesseshaveadaptedtolockdowns/2021-03-19)  
341 [19](https://www.ons.gov.uk/economy/economicoutputandproductivity/output/articles/coronavirushowpeopleandbusinesseshaveadaptedtolockdowns/2021-03-19) (accessed 27 Jan 2022).
- 342 5 World Health Organization. Transmission of SARS-CoV-2: implications for  
343 infection prevention precautions. 2020. [https://www.who.int/news-](https://www.who.int/news-room/commentaries/detail/transmission-of-sars-cov-2-implications-for-infection-prevention-precautions)  
344 [room/commentaries/detail/transmission-of-sars-cov-2-implications-for-infection-](https://www.who.int/news-room/commentaries/detail/transmission-of-sars-cov-2-implications-for-infection-prevention-precautions)  
345 [prevention-precautions](https://www.who.int/news-room/commentaries/detail/transmission-of-sars-cov-2-implications-for-infection-prevention-precautions) (accessed Aug 2021).
- 346 6 GOV UK. COVID-19: epidemiology, virology and clinical features. Gov.uk.  
347 2022. [https://www.gov.uk/government/publications/wuhan-novel-coronavirus-](https://www.gov.uk/government/publications/wuhan-novel-coronavirus-background-information/wuhan-novel-coronavirus-epidemiology-virology-and-clinical-features)  
348 [background-information/wuhan-novel-coronavirus-epidemiology-virology-and-](https://www.gov.uk/government/publications/wuhan-novel-coronavirus-background-information/wuhan-novel-coronavirus-epidemiology-virology-and-clinical-features)  
349 [clinical-features](https://www.gov.uk/government/publications/wuhan-novel-coronavirus-background-information/wuhan-novel-coronavirus-epidemiology-virology-and-clinical-features) (accessed 2022).
- 350 7 Office for National Statistics. Which occupations have the highest potential  
351 exposure to the coronavirus (COVID-19)?  
352 2020. [https://www.ons.gov.uk/employmentandlabourmarket/peopleinwork/emplo](https://www.ons.gov.uk/employmentandlabourmarket/peopleinwork/employmentandemployeetypes/articles/whichoccupationshavethehighestpotentialexposuretothecoronaviruscovid19/2020-05-11)  
353 [ymentandemployeetypes/articles/whichoccupationshavethehighestpotentialexpo](https://www.ons.gov.uk/employmentandlabourmarket/peopleinwork/employmentandemployeetypes/articles/whichoccupationshavethehighestpotentialexposuretothecoronaviruscovid19/2020-05-11)  
354 [suretothecoronaviruscovid19/2020-05-11](https://www.ons.gov.uk/employmentandlabourmarket/peopleinwork/employmentandemployeetypes/articles/whichoccupationshavethehighestpotentialexposuretothecoronaviruscovid19/2020-05-11) (accessed Aug 2020).
- 355 8 European Centre for Disease Prevention and Control. COVID-19 clusters and  
356 outbreaks in occupational settings in the EU/EEA and the UK.  
357 2020. [https://www.ecdc.europa.eu/en/publications-data/covid-19-clusters-and-](https://www.ecdc.europa.eu/en/publications-data/covid-19-clusters-and-outbreaks-occupational-settings-eueea-and-uk)  
358 [outbreaks-occupational-settings-eueea-and-uk](https://www.ecdc.europa.eu/en/publications-data/covid-19-clusters-and-outbreaks-occupational-settings-eueea-and-uk) (accessed 2021).
- 359 9 Health and Safety Executive. Working safely during the coronavirus (COVID-19)  
360 pandemic. <https://www.hse.gov.uk/coronavirus/working-safely/index.htm>  
361 (accessed Jan 2022).
- 362 10 Wei H, Daniels S, Whitfield CA, *et al.* Agility and Sustainability: A Qualitative  
363 Evaluation of COVID-19 Non-pharmaceutical Interventions in the UK Logistics

- 364 Sector. *Front Public Health* 2022;**10**:864506.
- 365 11 Mutambudzi M, Niedwiedz C, Macdonald EB, *et al.* Occupation and risk of  
366 severe COVID-19: prospective cohort study of 120 075 UK Biobank participants.  
367 *Occup Environ Med* Published Online First: 9 December 2020.  
368 doi:10.1136/oemed-2020-106731
- 369 12 Nafilyan V, Pawelek P, Ayoubkhani D, *et al.* Occupation and COVID-19 mortality  
370 in England: a national linked data study of 14.3 million adults. *Occup Environ*  
371 *Med* Published Online First: 27 December 2021. doi:10.1136/oemed-2021-  
372 107818
- 373 13 Public Health England. Coronavirus (COVID-19) in the UK.  
374 2020.<https://coronavirus.data.gov.uk> (accessed Aug 2020).
- 375 14 Public Health England. Investigation of SARS-CoV-2 variants of concern in  
376 England: technical briefing 6. 2021.
- 377 15 GOV UK. Prime Minister's address to the nation: 4 January 2021. Gov.uk.  
378 2021.[https://www.gov.uk/government/speeches/prime-ministers-address-to-the-](https://www.gov.uk/government/speeches/prime-ministers-address-to-the-nation-4-january-2021)  
379 [nation-4-january-2021](https://www.gov.uk/government/speeches/prime-ministers-address-to-the-nation-4-january-2021) (accessed Jan 2022).
- 380 16 Bridgen JRE, Jewell CP, Read JM. Social mixing patterns in the UK following  
381 the relaxation of COVID-19 pandemic restrictions: a cross-sectional online  
382 survey. *MedRxiv*. 2021. doi:10.1101/2021.10.22.21265371
- 383 17 Northern Ireland Statistics and Research Agency (NISRA), Office for National  
384 Statistics, Social Survey Division. Quarterly Labour Force Survey, November,  
385 2020 - January, 2021. UK Data Service. 2021. doi:10.5255/UKDA-SN-8788-2
- 386 18 Office for National Statistics, Social Survey Division, Northern Ireland Statistics  
387 and Research Agency, Central Survey Unit. Quarterly Labour Force Survey,  
388 February - April, 2021. UK Data Service. 2021. doi:10.5255/UKDA-SN-8813-2
- 389 19 Office for National Statistics, Northern Ireland Statistics and Research Agency.  
390 Quarterly Labour Force Survey, May - July, 2021. UK Data Service. 2021.  
391 doi:10.5255/UKDA-SN-8845-1
- 392 20 Office for National Statistics, Northern Ireland Statistics and Research Agency.  
393 Quarterly Labour Force Survey, July - September, 2021. UK Data ServiceUK  
394 Data Service. 2021. doi:10.5255/UKDA-SN-8872-1
- 395 21 Office for National Statistics, Northern Ireland Statistics and Research Agency.  
396 Quarterly Labour Force Survey, September - November 2021. UK Data Service.  
397 2022. doi:10.5255/UKDA-SN-8901-1
- 398 22 Northern Ireland Statistics and Research Agency (NISRA), Office for National  
399 Statistics, Social Survey Division. Quarterly Labour Force Survey, November,  
400 2021 - January, 2022. UK Data Service. 2022. doi: DOI: 10.5255/UKDA-SN-  
401 8927-2
- 402 23 Jarvis C, Edmunds J, CMMID COVID-19 Working Group. Social contacts in

- 403 workplace the UK from the CoMix social contact survey. London School of  
404 Hygiene and Tropical Medicine 2021.  
405 [https://cmmid.github.io/topics/covid19/reports/comix/Comix%20Report%20cont](https://cmmid.github.io/topics/covid19/reports/comix/Comix%20Report%20contacts%20in%20the%20workplace.pdf)  
406 [acts%20in%20the%20workplace.pdf](https://cmmid.github.io/topics/covid19/reports/comix/Comix%20Report%20contacts%20in%20the%20workplace.pdf)
- 407 24 Read JM, Eames KTD, Edmunds WJ. Dynamic social networks and the  
408 implications for the spread of infectious disease. *J R Soc Interface*  
409 2008;**5**:1001–7.
- 410 25 Smieszek T. A mechanistic model of infection: why duration and intensity of  
411 contacts should be included in models of disease spread. *Theor Biol Med Model*  
412 2009;**6**:25.
- 413 26 Danon L, Read JM, House TA, *et al.* Social encounter networks: characterizing  
414 Great Britain. *Proc Biol Sci* 2013;**280**:20131037.
- 415 27 Thompson HA, Mousa A, Dighe A, *et al.* Severe Acute Respiratory Syndrome  
416 Coronavirus 2 (SARS-CoV-2) Setting-specific Transmission Rates: A  
417 Systematic Review and Meta-analysis. *Clin Infect Dis* 2021;**73**:e754–64.
- 418 28 De Cao E, Zagheni E, Manfredi P, *et al.* The relative importance of frequency of  
419 contacts and duration of exposure for the spread of directly transmitted  
420 infections. *Biostatistics* 2014;**15**:470–83.
- 421 29 CDC. Masks and respirators. Centers for Disease Control and Prevention.  
422 2022.[https://www.cdc.gov/coronavirus/2019-ncov/prevent-getting-sick/types-of-](https://www.cdc.gov/coronavirus/2019-ncov/prevent-getting-sick/types-of-masks.html)  
423 [masks.html](https://www.cdc.gov/coronavirus/2019-ncov/prevent-getting-sick/types-of-masks.html) (accessed 13 Jul 2022).
- 424 30 Office for National Statistics. Population estimates.  
425 2021.[https://www.ons.gov.uk/peoplepopulationandcommunity/populationandmig](https://www.ons.gov.uk/peoplepopulationandcommunity/populationandmigration/populationestimates)  
426 [ration/populationestimates](https://www.ons.gov.uk/peoplepopulationandcommunity/populationandmigration/populationestimates) (accessed Jan 2022).
- 427 31 Daniels S, Wei H, Han Y, *et al.* Risk factors associated with respiratory  
428 infectious disease-related presenteeism: a rapid review. *BMC Public Health*  
429 2021;**21**:1955.
- 430

431 **Figures**

432 **Figure 1:** A) Number of total contacts and deliveries made per shift. Note, x-axis and  
433 y-axis on log-scale. B) Mean number of deliveries and contacts per shift by delivery  
434 type.

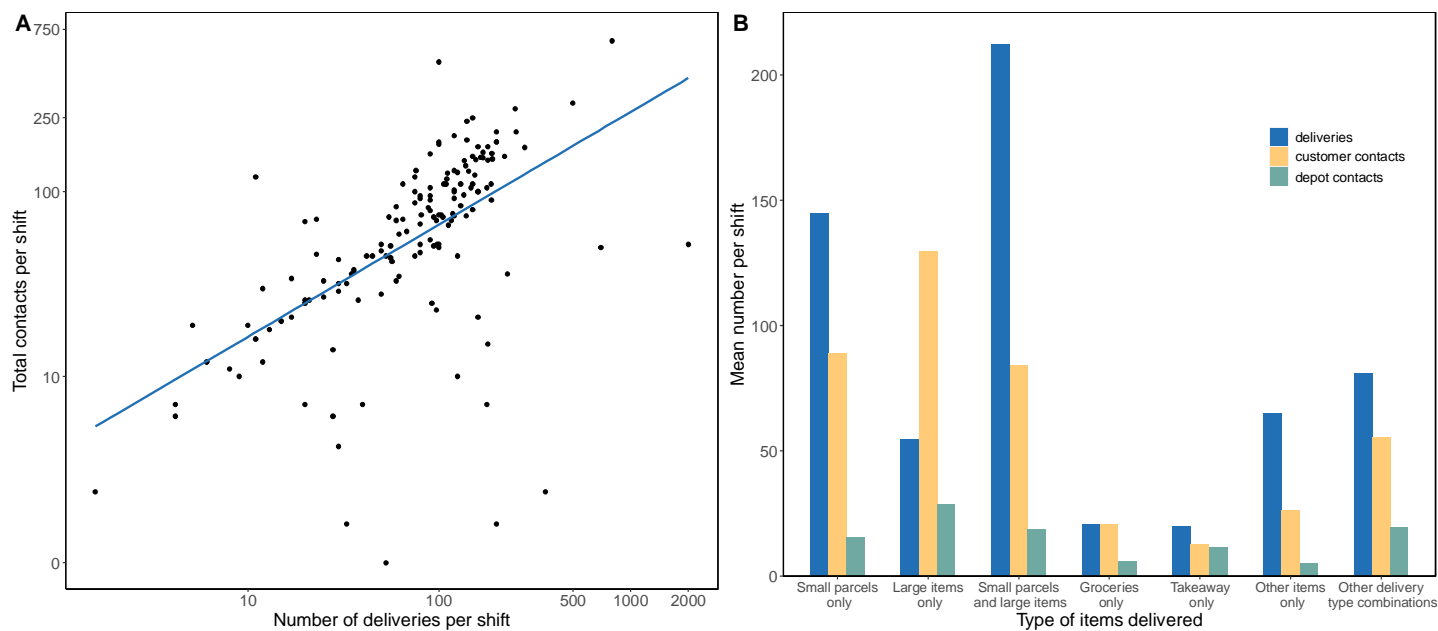

435

436 **Figure 2:** Adjusted incidence rate ratios for mean number of customer  
 437 contacts reported for selected variables. Open circles represent the reference  
 438 group for each variable.

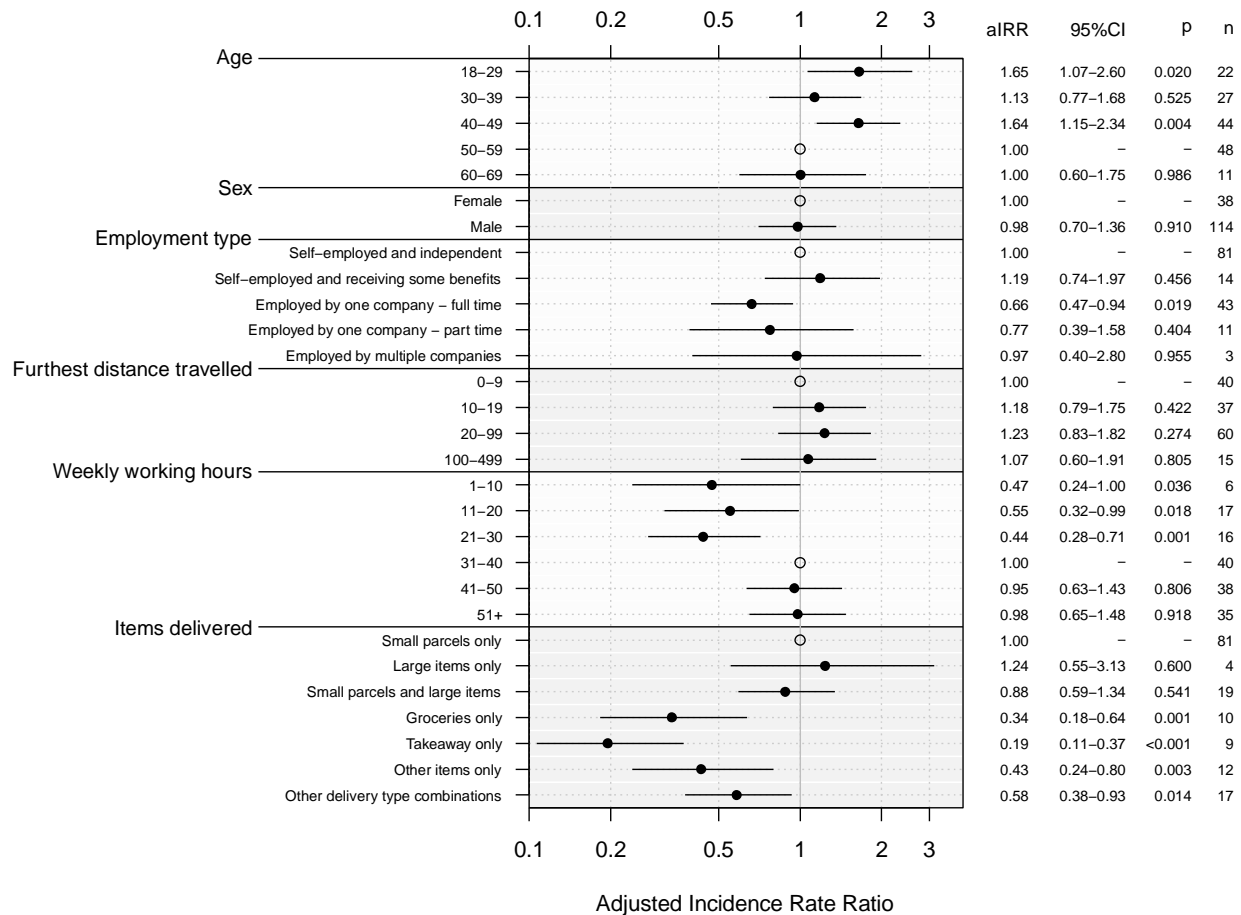



439 **Tables**

440

441 Table 1: Participant demographics and aggregated labour force survey estimates for  
 442 'delivery drivers and couriers'. N is the number of participants who provided a  
 443 response to the question.  
 444

|                                       | <b>Number of participants</b><br>(percentage, 95% binomial confidence interval) | <b>Aggregated Quarterly Labour Force Survey estimates for delivery drivers and couriers* [17–22]</b><br>November 2020 - January 2022<br><b>Number of participants</b><br>(percentage) |
|---------------------------------------|---------------------------------------------------------------------------------|---------------------------------------------------------------------------------------------------------------------------------------------------------------------------------------|
| <b>Age group</b>                      | N = 170 <sup>†</sup>                                                            | N = 1785                                                                                                                                                                              |
| <18                                   | - **                                                                            | 5 (0.3%)                                                                                                                                                                              |
| 18-29                                 | 27 (15.9%, 10.74%-22.26%)                                                       | 230 (12.9%)                                                                                                                                                                           |
| 30-39                                 | 35 (20.6%, 14.78%-27.45%)                                                       | 245 (13.7%)                                                                                                                                                                           |
| 40-49                                 | 46 (27.1%, 20.54%-34.39%)                                                       | 338 (18.9%)                                                                                                                                                                           |
| 50-59                                 | 50 (29.4%, 22.68%-36.87%)                                                       | 530 (29.7%)                                                                                                                                                                           |
| 60-69                                 | 12 (7.1%, 3.70%-12.01%)                                                         | 384 (21.5%)                                                                                                                                                                           |
| 70+                                   | 0 (0.0%, 0.00%-2.15%)                                                           | 53 (3.0%)                                                                                                                                                                             |
| <b>Sex</b>                            | N = 170 <sup>†</sup>                                                            | N = 1785                                                                                                                                                                              |
| Female                                | 40 (23.5%, 17.37%-30.63%)                                                       | 181 (10.1%)                                                                                                                                                                           |
| Male                                  | 128 (75.3%, 68.11%-81.58%)                                                      | 1604 (89.9%)                                                                                                                                                                          |
| Prefer not to say                     | 2 (1.2%, 0.14%-4.19%)                                                           | -                                                                                                                                                                                     |
| <b>Ethnicity</b>                      | N = 170                                                                         | N = 1785                                                                                                                                                                              |
| White                                 | 156 (91.8%, 86.57%-95.42%)                                                      | 1648 (92.3%)                                                                                                                                                                          |
| Mixed/Multiple ethnic groups          | 5 (2.9%, 0.96%-6.73%)                                                           | 9 (0.5%)                                                                                                                                                                              |
| Asian/Asian British                   | 5 (2.9%, 0.96%-6.73%)                                                           | 88 (4.9%)                                                                                                                                                                             |
| Black/African/Caribbean/Black British | 1 (0.6%, 0.01%-3.23%)                                                           | 26 (1.5%)                                                                                                                                                                             |
| Other ethnic groups                   | 0 (0.0%, 0.00%-2.15%)                                                           | 14 (0.8%)                                                                                                                                                                             |
| Prefer not to say                     | 3 (1.8%, 0.37%-5.07%)                                                           | -                                                                                                                                                                                     |
| No response                           | 0.00 (0%, 0.00%-2.15%)                                                          | 0 (0.0%)                                                                                                                                                                              |
| <b>Nation</b>                         | N = 170 <sup>†</sup>                                                            | N = 1785                                                                                                                                                                              |
| England                               | 139 (81.8%, 75.13%-87.26%)                                                      | 1491 (83.5%)                                                                                                                                                                          |
| Northern Ireland                      | 3 (1.8%, 0.37%-5.07%)                                                           | 79 (4.4%)                                                                                                                                                                             |
| Scotland                              | 18 (10.6%, 6.40%-16.22%)                                                        | 114 (6.4%)                                                                                                                                                                            |
| Wales                                 | 10 (5.9%, 2.86%-10.55%)                                                         | 101 (5.7%)                                                                                                                                                                            |

445 \* Main occupation of participant recorded as 'delivery drivers and couriers'

446 <sup>†</sup> Question required a response from the participant

447 \*\* Age group did not meet study inclusion criteria
